# Supplementary material for: A g-Type Lysozyme from Deep-Sea Hydrothermal Vent Shrimp Kills Selectively Gram-Negative Bacteria
Source: MDPI journal article supplement (doi:10.3390/molecules26247624), 2021-12-16
Supplement: s1 [file s1]

## Supplementary data

**Table S1.** Primers used in this study.

| Primer           | Sequence (5'-3')                             |
|------------------|----------------------------------------------|
| R43-F            | GACGGATCTTCAAGCAATGAAAGGCTAC                 |
| R43-R            | GTAGCCTTTCATTGCTTGAAGATCCGTC                 |
| K45-F            | CGGATCTTCAAAGGATGGCAGGCTACAAGCAAAAG          |
| K45-R            | CTTTTGCTTGTAGCCTGCCATCCTTTGAAGATCCG          |
| K48-F            | CAAAGGATGAAAGGCTACGCACAAAAGATCTCCAGTGTTG     |
| K48-R            | CAACACTGGAGATCTTTTGTGCGTAGCCTTTCATCCTTTG     |
| K50-F            | GAAAGGCTACAAGCAAGCAATCTCCAGTGTTGGGAC         |
| K50-R            | GTCCCAACACTGGAGATTGCTTGCTTGTAGCCTTTC         |
| K139-F           | CCTTCCAAGGCCTGTCCGCAGAGAAGAAGTTGAAAG         |
| K139-R           | CTTTCAACTTCTTCTCTGCGGACAGGCCTTGGAAGG         |
| KK141-F          | CCAAGGCCTGTCCAAGGAGGCAGCATTGAAAGCTGGGATAGCAG |
| KK141-R          | CTGCTATCCCAGCTTTCAATGCTGCCTCCTTGGACAGGCCTTGG |
| K144-F           | CAAGGAGAAGAAGTTGGCAGCTGGGATAGCAGC            |
| K144-R           | GCTGCTATCCCAGCTGCCAACTTCTTCTCCTTG            |
| TNF- $\alpha$ -F | ACTGAACTTCGGGGTGATCG                         |
| TNF- $\alpha$ -R | AGGGTCTGGGCCATAGAACT                         |
| IL6-F            | AGCCAGAGTCCTTCAGAGAGAT                       |
| IL6-R            | GAGAGCATTGGAAATTGGGGT                        |
| IL-1 $\beta$ -F  | TGCCACCTTTTGACAGTGATG                        |
| IL-1 $\beta$ -R  | TGTGCTGCTGCGAGATTTGA                         |
| $\beta$ -actin-F | CTGCCGCATCCTCTTCCTC                          |
| $\beta$ -actin-R | GGAAAAGAGCCTCAGGGCAT                         |

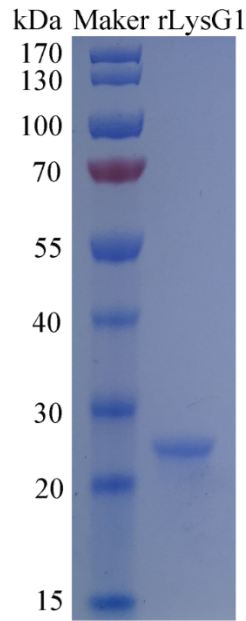

**Figure S1.** SDS-PAGE analysis of rLysG1. Purified rLysG1 was analyzed by SDS-PAGE and viewed after staining with Coomassie brilliant blue R-250.

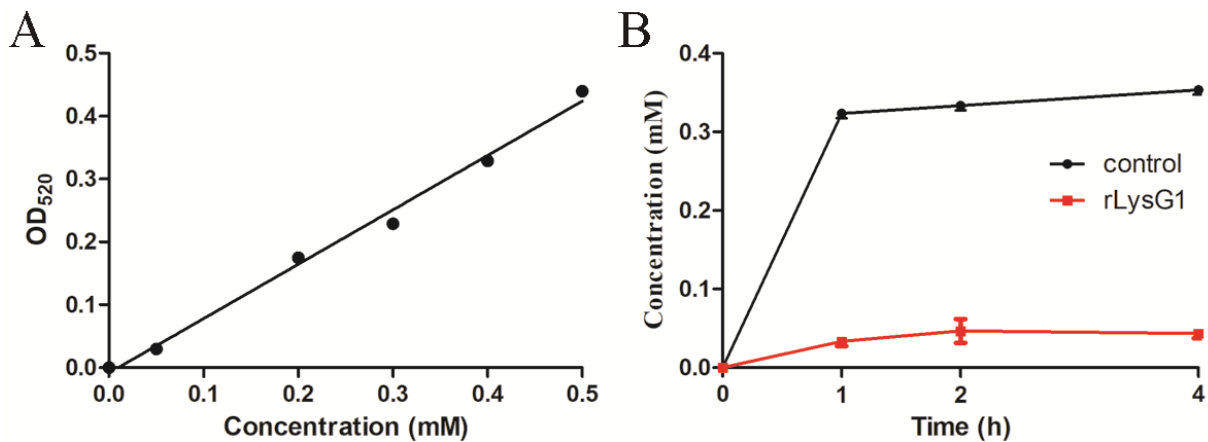

**Figure S2.** Analysis of the potential digestive effect of rLysG1 on peptidoglycan (PGN). **(A)** The standard curve of N-acetylglucosamine. Different concentrations of N-acetylglucosamine were incubated with 3, 5-Dinitrosalicylic acid (DNS) reagent, and the absorbance was measured at OD<sub>520</sub>. **(B)** The release of N-acetylglucosamine in PGN after incubation with a commercial lysozyme (control) or rLysG1 was measured by the above DNS method at different time. Values are shown as means  $\pm$  SD ( $n = 3$ ). N, the number of replicates.

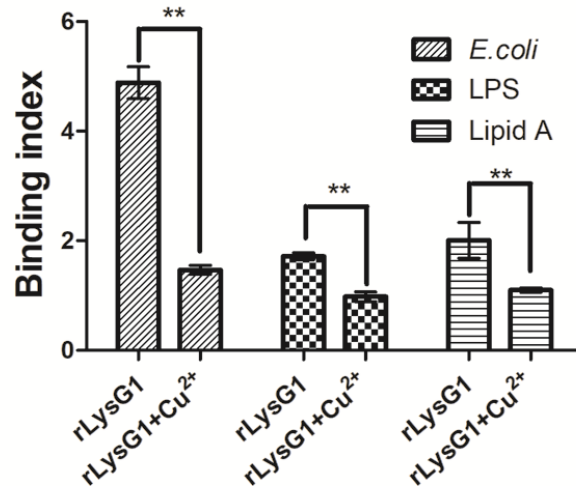

**Figure S3.** The effect of Cu<sup>2+</sup> on the binding of rLysG1 to bacteria and bacterial components. rLysG1 was incubated with *Escherichia coli*, LPS, or lipid A in the presence or absence of Cu<sup>2+</sup>, and the binding of rLysG1 was detected by ELISA. Values are shown as means  $\pm$  SD ( $n = 3$ ). N, the number of replicates. \*\*,  $p < 0.01$ .
